# Supplementary material
Source: PubMed Central journal article supplement (PMC2796822)
Supplement: btp628_1.pdf [file btp628_1.pdf]

# GATE: Software for the Analysis and Visualization of High-Dimensional Time-series Expression Data

Ben D. MacArthur<sup>1,2,†</sup>, Alexander Lachmann<sup>1,†</sup>, Ihor R. Lemischka<sup>2</sup> and Avi Ma'ayan<sup>1,\*</sup>

<sup>1</sup>Department of Pharmacology and Systems Therapeutics, Systems Biology Center New York (SBCNY); <sup>2</sup>

Department of Gene and Cell Medicine, Black Family Stem Cell Institute; Mount Sinai School of Medicine, One Gustave Levy Place, New York, NY 10029

\*To whom correspondence should be addressed. †Contributed equally.

## Supporting Text

**GATE clustering and visualization-** High-dimensional time-series are considered as an  $N \times M$  data matrix  $D \in \mathbb{R}^N \times \mathbb{R}^M$ , where  $N$  is the number of observed molecular species (genes, proteins etc) and  $M$  is the number of observation time-points. Thus, each row of  $D$  gives the time-series expression of a single molecular species in the experiment. In order to examine the systems-level flow of information through the system we need to first provide a “spatial” representation of the data: that is, we need to appropriately project the data matrix  $D$  onto an appropriate geometric object. However, since regulatory networks are often very complex, and thus cannot be visualized clearly in two dimensions (that is, they are not planar graphs), network representations do not easily allow such visualization of the dynamic flow of information through the system. In order to visualize the flow of information through a system it is more informative to project the data onto a regular geometric object which can easily be represented in two dimensions. In this case, in order to visualize regulatory dynamics in a coherent manner we project the data matrix  $D$  onto regular hexagonal array  $H$ . A hexagonal array is chosen since it ultimately presents the data in a form which is easier to visualize and interrogate than other tiling options (such as a rectangular tiling, for example). In order to provide a continuous geometric object with no boundaries we apply toroidal boundary conditions to the hexagonal array (that is, we associate the left and right hand sides of the array with each other, and the top and the bottom of the array with each other). Thus, we project the time-course data onto the surface of a hexagonally tiled torus. This projection ensures that there are no “special” places on the array and all molecular species are treated equally. In the absence of a defined regulatory network this projection may also be thought of as projecting the data onto a regular graph of degree 6. In mathematical terms, a projection of  $D$  onto  $H$  amounts to constructing a map  $f: D \in \mathbb{R}^N \times \mathbb{R}^M \rightarrow H$  in which each row of the matrix  $D$  (each molecular time-series) is assigned to a unique hexagon  $h_i \in H$ . We denote as  $F$  the space of all such maps. However, not all maps  $f(D) \in F$  will capture the systems-level regulatory dynamics equally well: for example, a random assignment of time-series to hexagons in the array will not (in general) capture the collective dynamics in the system since molecular species with similar expression patterns may not be near each other on the array. In order to construct the mapping which best captures collective dynamics we need to arrange the time-series on the array such that molecular species with similar expression patterns are near to each other on the array, while those with very different expression patterns are placed far apart. In order to do this we assign to each mapping  $f(D) \in F$  the fitness

$$-1 \leq \text{Fit}[f(D)] = \frac{\sum_{i=1}^N \sum_{j \in N_i} C_{ij}}{6N} \leq 1$$

where  $C_{ij}$  is the Pearson correlation coefficient between time-series  $i$  and  $j$  and  $N_i$  are the 6 neighbors of hexagon  $h_i$ .  $\text{Fit}[f(D)]$  measures how well a given arrangement captures the collective dynamics of the system as a whole: arrangements with low fitness do not capture
